# Supplementary material
Source: publisher figshare collection journal article supplement (https://karger.figshare.com/ndownloader/files/13663370)
Supplement: Supplementary file 1 [file 13663370]

# Supplementary Figure 1

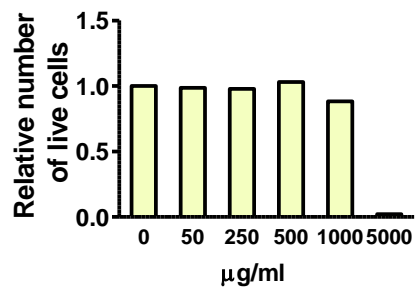

## Supplementary Figure 1. Titration of pregabalin in splenocytes

To define a pregabalin concentration for *in vitro* experiments, splenocytes were cultured with different pregabalin concentrations for 48 hours (0, 50, 250, 500, 1000 and 5000  $\mu\text{g} \cdot \text{ml}^{-1}$ ).
